# Supplementary material for: Predicting the virulence of MRSA from its genome sequence
Source: HighWire-hosted journal article supplement (doi:10.1101/gr.165415.113), 2014-04-09
Supplement: Supplemental_Legends.docx [file Supplemental_Legends.docx]

**Supp. Fig. 1a-d:** Adhesive activity of clinical ST239 isolates. (a) adherence of 90 ST239 isolates to fibrinogen in exponential phase of growth. (b) adherence of 90 ST239 isolates to fibronectin in exponential phase of growth. (c) adherence of 90 ST239 isolates to fibrinogen in stationary phase of growth. (d) adherence of 90 ST239 isolates to fibronectin in stationary phase of growth.

**Supp. Fig. 2**: The ST239 MRSA isolates used in this study lysed T cells and lipid

vesicles equivalently. A subset of 18 isolates is shown for illustrative purposes. Their ability to lyse T cells is represented in blue and on the left hand Y axis, and their ability to lyse the lipid vesicles is represented in red and on the right hand Y axis.

**Supp. Fig. 3:** The ST239 isolates used in this study do not express detectable

amounts of alpha toxin. Western blots using anti-alpha toxin antibodies were

performed on TCA precipitated 18hr bacterial supernatants of all 90 isolates. A subset of eight isolates is shown for illustrative purposes. As a positive control the laboratory strains 8325-4 was included as it produces detectable amount of alpha toxin.

**Supp. Fig. 4:** Identification of SNPs significantly associated with toxicity. GWAS was used to identify toxicity associated SNPs, shown here as Manhattan plots before and after controlling for genomic inflation (*a* and *c*, respectively). The location and description of each significant SNP can be found in supp. tables 2 a and b. The early deviation of the observed *p* values from the expected values (QQ-plot, *b*) can be interpreted as a signature of population structuring or of non-causal variants hitchhiking on a clonal genomic background with a causal variants. Correcting for this genomic inflation results in lower *p* values, but with equal distribution across the genome (*c*), and a closer fit between expected and observed distributions (*d*).

**Supp. Fig. 5:** Cluster dendrogram of whole genome SNP signatures. Assessing the uncertainty of hierarchical clustering using the *R* package *pvclust* shows good statistical support for three main clusters, highlighted by the red rectangles. Values in red are approximate unbiased (AU) *p*-values and in green are the bootstrap probability (BP) *p*-values (in %).

**Supp. Fig. 6:** Relationship of toxicity associated SNPs and indels. Using hierarchical clustering analysis based on the snp/indel distance (dissimiliarity) matrix (a) is a tree showing all SNPs and indels, with those in linkage disequilibrium clustered together and coloured either blue or green for illustrative purposes; and (b) a tree of only the uniquely occurring SNPs and indels.

**Supp. Table 1:** Isolates and plasmids used in this study.

(Kreiswirth BN, Löfdahl S, Betley MJ, O'Reilly M, Schlievert PM, Bergdoll MS, Novick RP. 1983. The toxic shock syndrome exotoxin structural gene is not detectably transmitted by a prophage. *Nature* **305:** 709–712.)

**Supp. Table 2:** SNPs and indels associated with toxicity. A: those associated with an increase in toxicity. B: those associated with a decrease in toxicity.

The SNPs/indels are listed in order of position (SNP site, column 1) from the origin of replication. The nucleotide change at that site is listed in the 2nd column (nt change). The gene or locus at that site is listed in the 3rd column. –LogP: indicates the significance of the association between this SNP and a change in phenotype. The arrows in the 5th column indicate whether the change associated with this SNP is an increase or decrease in phenotype. The change in the amino acid that results from the SNP is listed in the 6th column. n/a: listed where an intergenic site is affected. syn: listed where the nucleotide change does not change the amino acid at that site.

**Supp. Table 3:** Epistasis between SNPs and indels that affect toxicity. The SNPs/indels that interact epistatically are listed in the columns labeled position 1 and position 2 in each row. The number in these columns represents the distance in base pairs from the origin of replication. The change in nucleotide at that site is listed in the columns labeled “change”. The genes and loci affected are listed in the columns labeled gene/locus 1 and 2. The significance of the association between these loci and their affect on toxicity is listed in the final column (-LogP).
