# Supplementary material for: Predicting the virulence of MRSA from its genome sequence
Source: HighWire-hosted journal article supplement (doi:10.1101/gr.165415.113), 2014-04-09
Supplement: Supplemental_Table_1.xlsx [file Supplemental_Table_1.xlsx]

## Sheet: Sheet1
Isolate/plasmid name	Laboratory/Clinical	Infectious Source	Reference	Mapping
RN4220	Lab: rsbU-	N/A	(Kreisworth et al. 1983)	N/A
ROJ48	Lab: RN4220 Δagr::ErmB agrP3-lux	N/A	(Jensen et al. 2008)	N/A
TJS114	Lab: ROJ48 pAgrCI311T	N/A	This work	N/A
TJS120	Lab: ROJ48 pAgrCI311TA343T	N/A	This work	N/A
pAgrP2C1A	Plasmid: pSKerm agrP2 agrC1 agrA CmR	N/A	(Jensen et al. 2008)	N/A
pAgrCI311T	Plasmid: pSKerm agrP2 agrC1 I311T agrA CmR	N/A	This work	N/A
pAgrCI311TA343T	Plasmid: pSKerm agrP2 agrC1 I311T A343T agrA CmR	N/A	This work	N/A
FPR3757	Wild type USA300 isolate	N/A	This work	N/A
AgrB-	FPR3757 Tn::agrB	N/A	This work	N/A
95A07	FPR3757 Tn::298351	N/A	This work	N/A
93B09	FPR3757 Tn::690868	N/A	This work	N/A
82B04	FPR3757 Tn::717257	N/A	This work	N/A
180A03	FPR3757 Tn::728946	N/A	This work	N/A
207A03	FPR3757 Tn::1050930	N/A	This work	N/A
90D01	FPR3757 Tn::1429479	N/A	This work	N/A
137C12	FPR3757 Tn::1907464	N/A	This work	N/A
45D06	FPR3757 Tn::2003286	N/A	This work	N/A
179A03	FPR3757 Tn::2087951	N/A	This work	N/A
108B09	FPR3757 Tn::2380097	N/A	This work	N/A
86C03	FPR3757 Tn::2487759	N/A	This work	N/A
168A05	FPR3757 Tn::2504661	N/A	This work	N/A
72A04	FPR3757 Tn::2601159	N/A	This work	N/A
DEU1	Clinical ST239 from Dokuz Eylul University, Turkey.	Abscess	(Castillo-Ramirez et al. 2012)	163.073
DEU2	Clinical ST239 from Dokuz Eylul University, Turkey.	Aspiration	(Castillo-Ramirez et al. 2012)	225.512
DEU3	Clinical ST239 from Dokuz Eylul University, Turkey.	Blood	(Castillo-Ramirez et al. 2012)	56.0555
DEU4	Clinical ST239 from Dokuz Eylul University, Turkey.	Blood	(Castillo-Ramirez et al. 2012)	110.658
DEU5	Clinical ST239 from Dokuz Eylul University, Turkey.	Wound	(Castillo-Ramirez et al. 2012)	77.9687
DEU6	Clinical ST239 from Dokuz Eylul University, Turkey.	Wound	(Castillo-Ramirez et al. 2012)	55.1489
DEU7	Clinical ST239 from Dokuz Eylul University, Turkey.	Blood	(Castillo-Ramirez et al. 2012)	75.3405
DEU8	Clinical ST239 from Dokuz Eylul University, Turkey.	Wound	(Castillo-Ramirez et al. 2012)	66.5261
DEU9	Clinical ST239 from Dokuz Eylul University, Turkey.	Aspiration	(Castillo-Ramirez et al. 2012)	60.2655
DEU10	Clinical ST239 from Dokuz Eylul University, Turkey.	Catheter	(Castillo-Ramirez et al. 2012)	134.581
DEU11	Clinical ST239 from Dokuz Eylul University, Turkey.	Blood	(Castillo-Ramirez et al. 2012)	109.398
DEU12	Clinical ST239 from Dokuz Eylul University, Turkey.	Sputum	(Castillo-Ramirez et al. 2012)	124.998
DEU14	Clinical ST239 from Dokuz Eylul University, Turkey.	Bronchoalveoler lavage	(Castillo-Ramirez et al. 2012)	89.4824
DEU15	Clinical ST239 from Dokuz Eylul University, Turkey.	Aspiration	(Castillo-Ramirez et al. 2012)	83.4031
DEU16	Clinical ST239 from Dokuz Eylul University, Turkey.	Blood	(Castillo-Ramirez et al. 2012)	152.742
DEU17	Clinical ST239 from Dokuz Eylul University, Turkey.	Blood	(Castillo-Ramirez et al. 2012)	98.8931
DEU19	Clinical ST239 from Dokuz Eylul University, Turkey.	Peritoneum fluid	(Castillo-Ramirez et al. 2012)	105.361
DEU20	Clinical ST239 from Dokuz Eylul University, Turkey.	Blood	(Castillo-Ramirez et al. 2012)	186.106
DEU22	Clinical ST239 from Dokuz Eylul University, Turkey.	Wound	(Castillo-Ramirez et al. 2012)	168.813
DEU23	Clinical ST239 from Dokuz Eylul University, Turkey.	Urine	(Castillo-Ramirez et al. 2012)	107.261
DEU25	Clinical ST239 from Dokuz Eylul University, Turkey.	Blood	(Castillo-Ramirez et al. 2012)	111.095
DEU27	Clinical ST239 from Dokuz Eylul University, Turkey.	Catheter	(Castillo-Ramirez et al. 2012)	115.078
DEU28	Clinical ST239 from Dokuz Eylul University, Turkey.	Blood	(Castillo-Ramirez et al. 2012)	139.971
DEU29	Clinical ST239 from Dokuz Eylul University, Turkey.	Blood	(Castillo-Ramirez et al. 2012)	124.599
DEU30	Clinical ST239 from Dokuz Eylul University, Turkey.	Wound	(Castillo-Ramirez et al. 2012)	155.733
DEU35	Clinical ST239 from Dokuz Eylul University, Turkey.	Tracheal secret	(Castillo-Ramirez et al. 2012)	323.212
DEU36	Clinical ST239 from Dokuz Eylul University, Turkey.	Plevral fluid	(Castillo-Ramirez et al. 2012)	176.39
DEU37	Clinical ST239 from Dokuz Eylul University, Turkey.	Blood	(Castillo-Ramirez et al. 2012)	107.181
DEU38	Clinical ST239 from Dokuz Eylul University, Turkey.	Aspiration	(Castillo-Ramirez et al. 2012)	79.3742
DEU39	Clinical ST239 from Dokuz Eylul University, Turkey.	Catheter	(Castillo-Ramirez et al. 2012)	61.913
DEU40	Clinical ST239 from Dokuz Eylul University, Turkey.	Wound	(Castillo-Ramirez et al. 2012)	83.0788
DEU41	Clinical ST239 from Dokuz Eylul University, Turkey.	Blood	(Castillo-Ramirez et al. 2012)	45.8425
DEU42	Clinical ST239 from Dokuz Eylul University, Turkey.	Blood	(Castillo-Ramirez et al. 2012)	103.322
DEU43	Clinical ST239 from Dokuz Eylul University, Turkey.	Blood	(Castillo-Ramirez et al. 2012)	142.496
DEU46	Clinical ST239 from Dokuz Eylul University, Turkey.	Blood	(Castillo-Ramirez et al. 2012)	69.3336
DEU47	Clinical ST239 from Dokuz Eylul University, Turkey.	Wound	(Castillo-Ramirez et al. 2012)	124.814
DEU49	Clinical ST239 from Dokuz Eylul University, Turkey.	Blood	(Castillo-Ramirez et al. 2012)	122.168
DEU50	Clinical ST239 from Dokuz Eylul University, Turkey.	Tracheal secret	(Castillo-Ramirez et al. 2012)	191.172
HU2	Clinical ST239 from Hacettepe University, Turkey.	Blood	(Castillo-Ramirez et al. 2012)	149.783
HU4	Clinical ST239 from Hacettepe University, Turkey.	Tracheal secret	(Castillo-Ramirez et al. 2012)	134.493
HU5	Clinical ST239 from Hacettepe University, Turkey.	Catheter	(Castillo-Ramirez et al. 2012)	123.278
HU6	Clinical ST239 from Hacettepe University, Turkey.	Sputum	(Castillo-Ramirez et al. 2012)	99.4022
HU7	Clinical ST239 from Hacettepe University, Turkey.	Abscess	(Castillo-Ramirez et al. 2012)	133.938
HU8	Clinical ST239 from Hacettepe University, Turkey.	Abscess	(Castillo-Ramirez et al. 2012)	183.131
HU9	Clinical ST239 from Hacettepe University, Turkey.	Liver cyst	(Castillo-Ramirez et al. 2012)	194.04
HU10	Clinical ST239 from Hacettepe University, Turkey.	Catheter	(Castillo-Ramirez et al. 2012)	100.178
HU11	Clinical ST239 from Hacettepe University, Turkey.	Blood	(Castillo-Ramirez et al. 2012)	87.8598
HU12	Clinical ST239 from Hacettepe University, Turkey.	Catheter	(Castillo-Ramirez et al. 2012)	105.994
HU13	Clinical ST239 from Hacettepe University, Turkey.	Brain abscess	(Castillo-Ramirez et al. 2012)	125.426
HU14	Clinical ST239 from Hacettepe University, Turkey.	Catheter	(Castillo-Ramirez et al. 2012)	108.859
HU15	Clinical ST239 from Hacettepe University, Turkey.	Catheter	(Castillo-Ramirez et al. 2012)	219.249
HU16	Clinical ST239 from Hacettepe University, Turkey.	Spinal fluid	(Castillo-Ramirez et al. 2012)	190.926
HU17	Clinical ST239 from Hacettepe University, Turkey.	Brain abscess	(Castillo-Ramirez et al. 2012)	145.434
HU18	Clinical ST239 from Hacettepe University, Turkey.	Catheter	(Castillo-Ramirez et al. 2012)	137.566
HU19	Clinical ST239 from Hacettepe University, Turkey.	Tracheal secret	(Castillo-Ramirez et al. 2012)	109.875
HU21	Clinical ST239 from Hacettepe University, Turkey.	Spinal fluid	(Castillo-Ramirez et al. 2012)	92.3591
HU23	Clinical ST239 from Hacettepe University, Turkey.	Spinal fluid	(Castillo-Ramirez et al. 2012)	121.134
HU24	Clinical ST239 from Hacettepe University, Turkey.	Blood	(Castillo-Ramirez et al. 2012)	100.39
HU25	Clinical ST239 from Hacettepe University, Turkey.	Abscess	(Castillo-Ramirez et al. 2012)	103.313
HU26	Clinical ST239 from Hacettepe University, Turkey.	Blood	(Castillo-Ramirez et al. 2012)	77.0362
IU1	Clinical ST239 from Istanbul University, Turkey.	Blood	(Castillo-Ramirez et al. 2012)	161.959
IU2	Clinical ST239 from Istanbul University, Turkey.	Blood	(Castillo-Ramirez et al. 2012)	157.466
IU3	Clinical ST239 from Istanbul University, Turkey.	Blood	(Castillo-Ramirez et al. 2012)	113.364
IU4	Clinical ST239 from Istanbul University, Turkey.	Sputum	(Castillo-Ramirez et al. 2012)	130.359
IU6	Clinical ST239 from Istanbul University, Turkey.	Blood	(Castillo-Ramirez et al. 2012)	128.621
IU7	Clinical ST239 from Istanbul University, Turkey.	Catheter	(Castillo-Ramirez et al. 2012)	187.155
IU8	Clinical ST239 from Istanbul University, Turkey.	Blood	(Castillo-Ramirez et al. 2012)	234.777
IU9	Clinical ST239 from Istanbul University, Turkey.	Nasal swab	(Castillo-Ramirez et al. 2012)	73.4139
IU10	Clinical ST239 from Istanbul University, Turkey.	Blood	(Castillo-Ramirez et al. 2012)	102.502
IU11	Clinical ST239 from Istanbul University, Turkey.	Blood	(Castillo-Ramirez et al. 2012)	94.4021
IU12	Clinical ST239 from Istanbul University, Turkey.	Abscess	(Castillo-Ramirez et al. 2012)	119.372
IU13	Clinical ST239 from Istanbul University, Turkey.	Abscess	(Castillo-Ramirez et al. 2012)	81.6009
IU14	Clinical ST239 from Istanbul University, Turkey.	Sputum	(Castillo-Ramirez et al. 2012)	124.837
IU15	Clinical ST239 from Istanbul University, Turkey.	Transtracheal asp. fluid	(Castillo-Ramirez et al. 2012)	184.871
IU16	Clinical ST239 from Istanbul University, Turkey.	No info.	(Castillo-Ramirez et al. 2012)	193.691
IU17	Clinical ST239 from Istanbul University, Turkey.	No info.	(Castillo-Ramirez et al. 2012)	60.1257
IU18	Clinical ST239 from Istanbul University, Turkey.	No info.	(Castillo-Ramirez et al. 2012)	259.318
IU19	Clinical ST239 from Istanbul University, Turkey.	No info.	(Castillo-Ramirez et al. 2012)	208.772
IU20	Clinical ST239 from Istanbul University, Turkey.	No info.	(Castillo-Ramirez et al. 2012)	160.796
MU1	Clinical ST239 from Marmara University, Turkey.	Blood	(Castillo-Ramirez et al. 2012)	160.741
MU2	Clinical ST239 from Marmara University, Turkey.	Blood	(Castillo-Ramirez et al. 2012)	57.4898
MU3	Clinical ST239 from Marmara University, Turkey.	Wound	(Castillo-Ramirez et al. 2012)	118.633
MU4	Clinical ST239 from Marmara University, Turkey.	Abscess	(Castillo-Ramirez et al. 2012)	127.882
MU5	Clinical ST239 from Marmara University, Turkey.	Wound	(Castillo-Ramirez et al. 2012)	140.406
MU6	Clinical ST239 from Marmara University, Turkey.	Blood	(Castillo-Ramirez et al. 2012)	121.69
MU7	Clinical ST239 from Marmara University, Turkey.	Blood	(Castillo-Ramirez et al. 2012)	38.2094
MU9	Clinical ST239 from Marmara University, Turkey.	Wound	(Castillo-Ramirez et al. 2012)	73.7819
MU11	Clinical ST239 from Marmara University, Turkey.	Blood	(Castillo-Ramirez et al. 2012)	197.588
MU19	Clinical ST239 from Marmara University, Turkey.	Blood	(Castillo-Ramirez et al. 2012)	120.205
MU20	Clinical ST239 from Marmara University, Turkey.	Blood	(Castillo-Ramirez et al. 2012)	127.619
